# Supplementary material
Source: PubMed Central journal article supplement (PMC3868383)
Supplement: Supp_Fig1.pdf [file Supp_Fig1.pdf]

## Supplementary Data

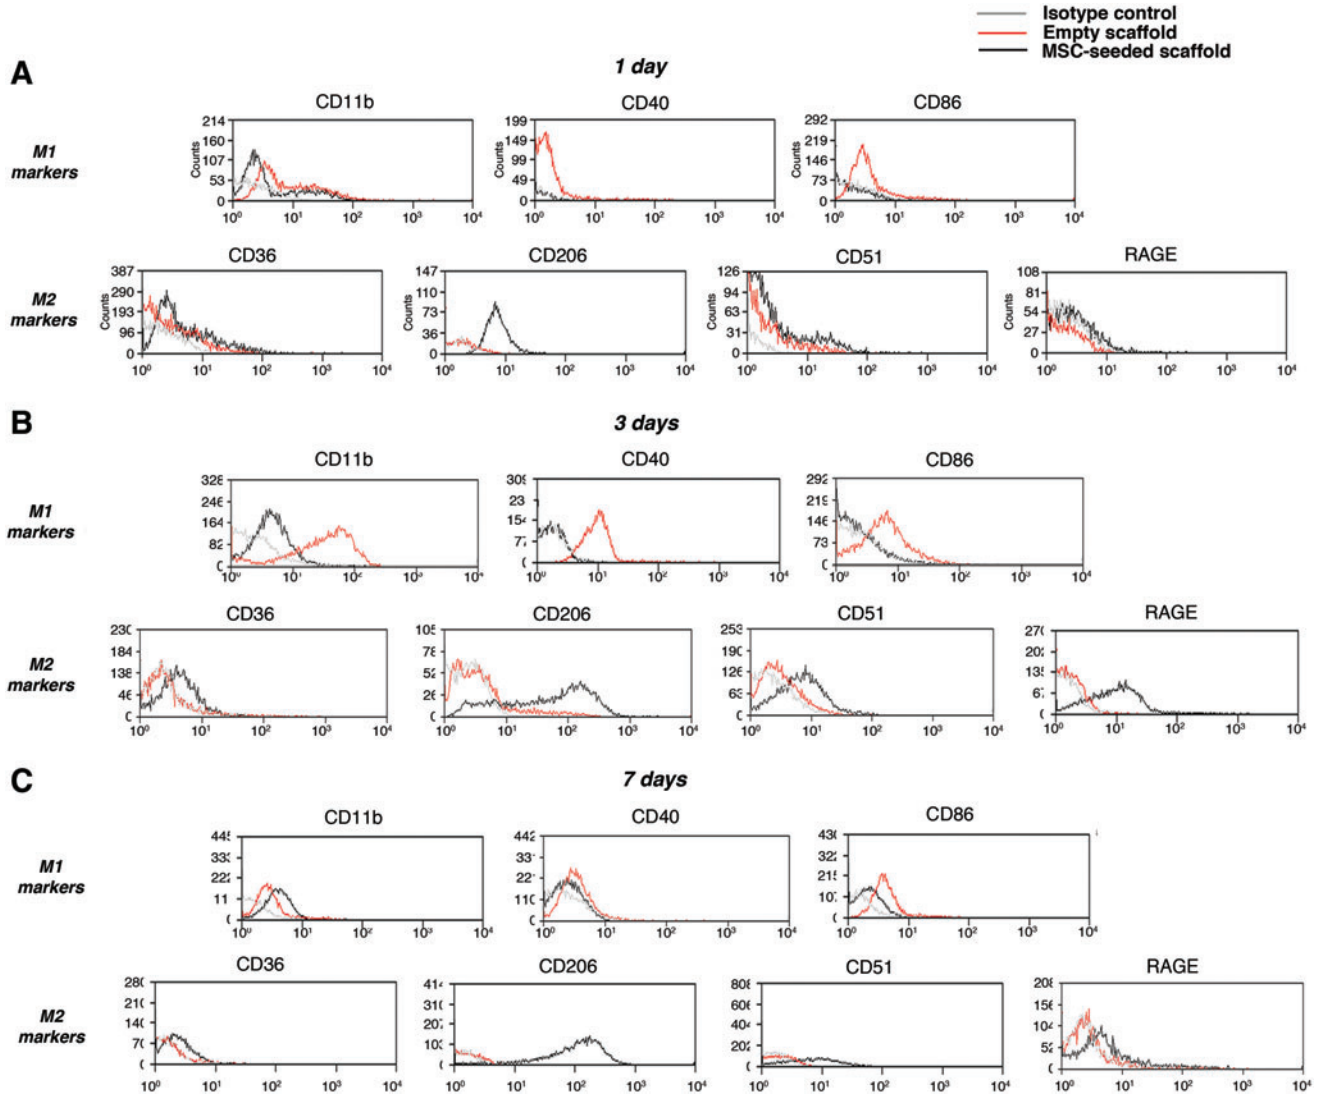

**SUPPLEMENTARY FIG. S1.** Phenotypic characterization of M1 and M2 macrophages recruited from mesenchymal stem cell (MSC)-seeded (*black line*) and empty (*red line*) scaffolds after different implantation times. Flow-cytometric analysis of macrophages recruited 1 day (A), 3 days (B), and 7 days (C) after implantation. The *gray line* indicates nonreactive immunoglobulin of the same isotype, which was included as a negative control. Presented data refer to one representative experiment.
