# Supplementary material
Source: PubMed Central journal article supplement (PMC3868383)
Supplement: Supp_Fig2.pdf [file Supp_Fig2.pdf]

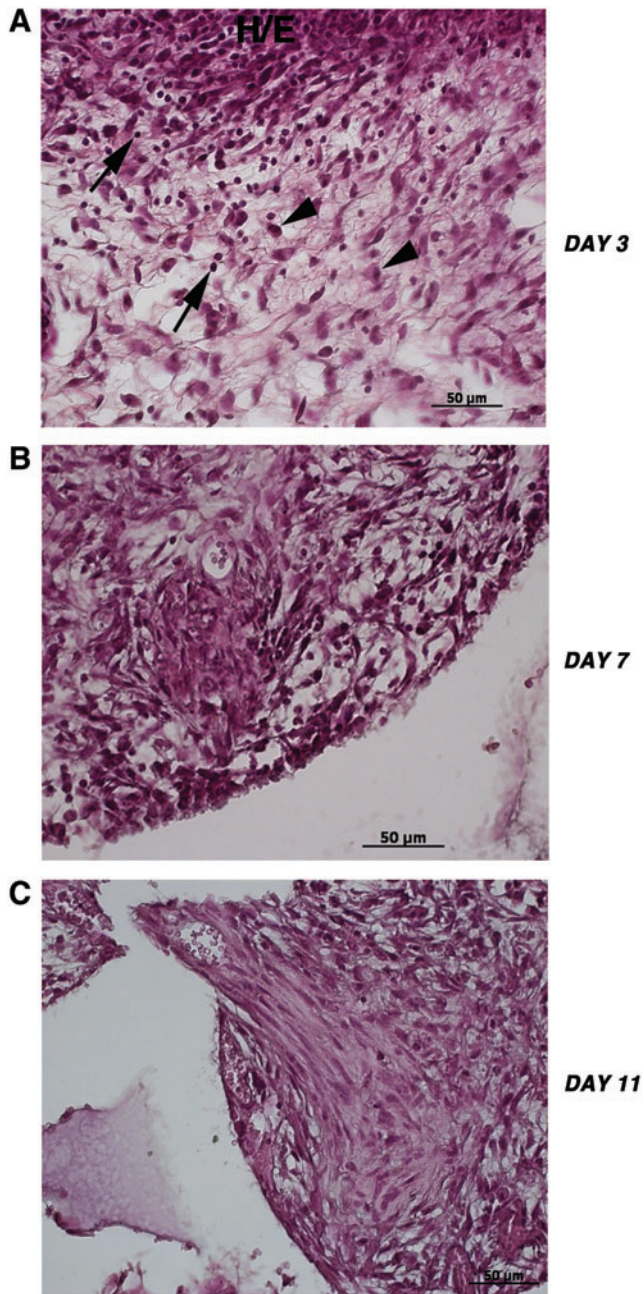

**SUPPLEMENTARY FIG. S2.** Inflammatory reaction within the pores of implanted MSC/scaffold constructs. **(A)** A strong inflammatory infiltrate, mainly composed of lymphocytes (*black arrows*) and macrophages (*black arrowheads*), is observed within the pores of MSC-seeded scaffolds extracted 3 days after implantation in vivo in immunocompetent syngeneic recipient mice. Hematoxylin and eosin (H/E) staining, magnification 40 $\times$ . **(B)** Seven days after implantation, a fibrous connective tissue is present within the MSC-seeded scaffolds. H/E staining, magnification 40 $\times$ . **(C)** A compact tissue formed by fibroblast-like proliferating cells is observed 11 days after implantation. H/E staining, magnification 40 $\times$ .
