# Supplementary material
Source: PubMed Central journal article supplement (PMC3868383)
Supplement: Supp_Fig3.pdf [file Supp_Fig3.pdf]

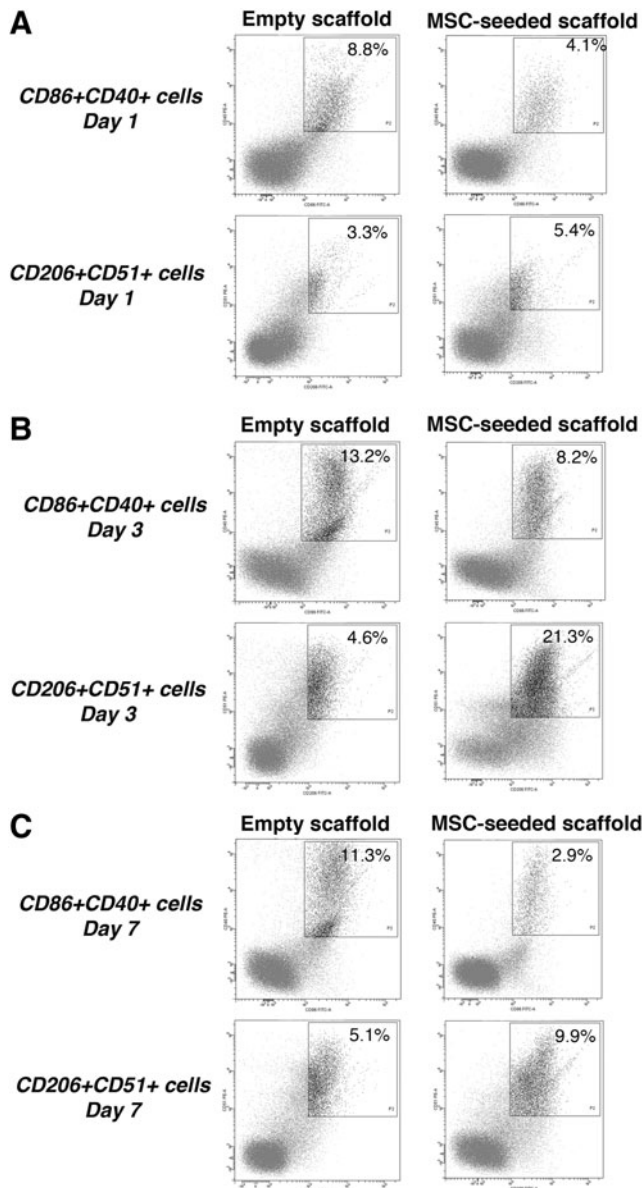

**SUPPLEMENTARY FIG. S3.** Time-dependent recruitment of M1 (CD86 + CD40+) and M2 (CD206 + CD51+) macrophages within empty and MSC-seeded scaffolds. Representative sorting of M1 (*upper panels*) and M2 (*bottom panels*) macrophages recovered 1 day (**A**), 3 days (**B**), and 7 days (**C**) after implantation.
