# Supplementary material
Source: PubMed Central journal article supplement (PMC3868383)
Supplement: Supp_Fig4.pdf [file Supp_Fig4.pdf]

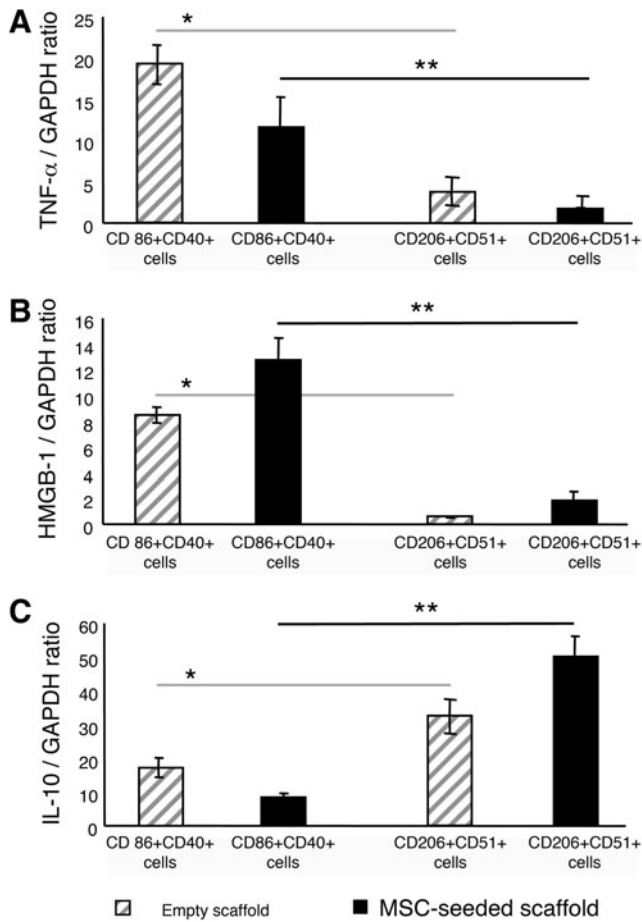

**SUPPLEMENTARY FIG. S4.** Real-time polymerase chain reaction of mRNA from M1 (CD86 + CD40+) and M2 (CD206 + CD51+) macrophages isolated from control empty and MSC-seeded scaffolds 3 days after implantation. **(A)** Tumor necrosis factor- $\alpha$  (TNF- $\alpha$ ), **(B)** high mobility group box 1 (HMGB-1) and **(C)** interleukin (IL)-10 expression were normalized to the expression of GAPDH. Normalized data were averaged from three independent experiments, and expressed as mean  $\pm$  standard deviation. \*Represents the statistical significance between M1 and M2 macrophages extracted from control empty scaffolds. \*\*Represents the statistical significance between M1 and M2 macrophages extracted from MSC-seeded scaffolds.
