# Supplementary material
Source: PubMed Central journal article supplement (PMC3868383)
Supplement: Supp_Fig5.pdf [file Supp_Fig5.pdf]

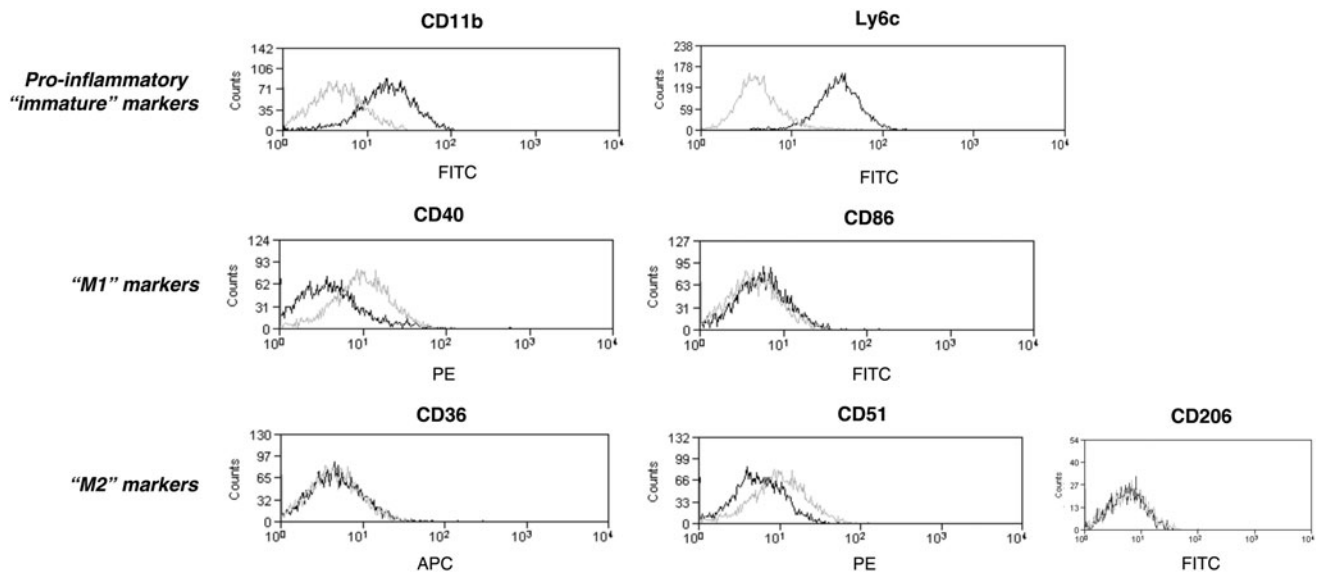

**SUPPLEMENTARY FIG. S5.** Phenotypic characterization of bone marrow (BM)-derived macrophages. Flow cytometric analysis of BM-derived macrophages isolated from C57Bl/6 mice and cultured in standard medium supplemented with macrophage-colony stimulating factor (M-CSF). The *upper panels* show the expression of the proinflammatory markers CD11b and Ly6C, the *middle panels* show the expression of the M1 markers CD40 and CD86, whereas the *bottom panels* show the expression of the M2 markers CD36, CD51, and CD206. The *black line* represents the expression of the specific marker in the tested cell population. The *gray line* refers to a nonreactive immunoglobulin of the same isotype, which was included as a negative control. Presented data refer to one representative experiment.
