# Supplementary material
Source: PubMed Central journal article supplement (PMC3868383)
Supplement: Supp_Fig6.pdf [file Supp_Fig6.pdf]

**MSC-SEEDED SCAFFOLD (60 DAYS)**

**H/E**

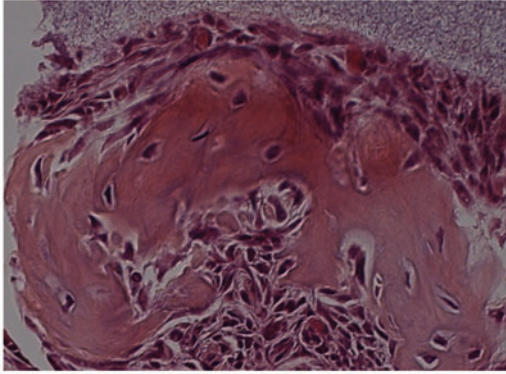

**ANTI-RFP**

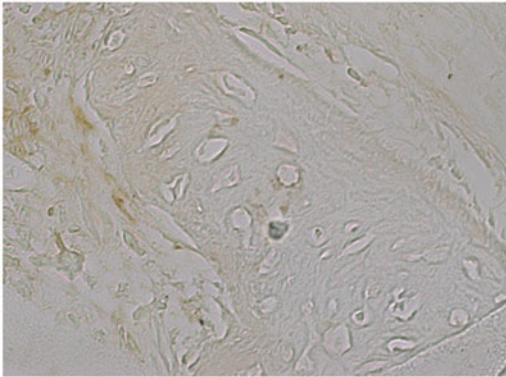

**SUPPLEMENTARY FIG. S6.** In vivo osteogenic potential of RFPpos MSCs. *Upper panel:* Representative H/E staining performed on sections of MSC/scaffold constructs implanted in immunocompetent syngeneic recipient mice and analyzed 60 days after implantation in vivo. *Left panel:* Representative immunohistochemical staining using a specific anti-RFP Ab on the same sections.
